sidered "a short supplement" to Humphrey's well known *British Consular Reports on the Trade and Politics of Latin America*.

Pentland (about whom the editor of the document, J. Valerie Fifer, gives us no information) left for Bolivia in September, 1826, and stayed in this newest Latin American country until April, 1827. He visited the areas of La Paz, Oruro, Potosí and Chuquisaca, missing Tarija and the vast east of Santa Cruz and the Beni.

The report has much about mining since Pentland visited nearly all mining districts. Here it is a storehouse of precise information that can hardly be duplicated. This is followed by a discussion of foreign and domestic commerce of the new Bolivia. This, too, is most useful and interesting. The last part deals with the political and administrative status of Bolivia at the time of his visit. This again has solid data. His sketch of President Sucre is most complimentary to him as a politician, statesman and writer. His ability as a writer is confirmed by my own research where Sucre impressed me with his exquisite penmanship and his many editorials in the first Bolivian newspaper. I am pleased that Pentland agreed.

In sum, this is a most useful study. Will it be known since it is buried in this collection of so different studies?

University of South Florida

CHARLES W. ARNADE

*Latin America and the United States*. By GRAHAM H. STUART and JAMES L. TIGNER. 6th ed. Englewood Cliffs, New Jersey, 1975. Prentice-Hall. Tables. Figures. Appendix. Index. Pp. viii, 856. Cloth. \$13.95.

Graham H. Stuart's *Latin America and the United States* was not only the first textbook on United States-Latin American relations, but, from 1922 to about 1960 it was the only one. Beginning in 1926, at the University of Texas, the undersigned used the Stuart volume as a text for his course on our Latin American relations. He therefore can claim longtime acquaintance with the volume through its several editions. Now, twenty years since the publication of the fifth edition in 1955, a sixth is offered under the joint authorship of Dr. Stuart and Professor James L. Tigner of the University of Nevada.

The present volume, enlarged about 45 per cent, retains the structural plan of the earlier edition: the same number of chapters and identical titles. Also, most of the original textual content is retained, although with considerable elaboration for the sake of clarity, but not necessarily new interpretation. The materials covering developments from 1955 to 1973 are skillfully distributed among the several chapters. In sum, the volume makes no significant departure from the traditional interpretations of the earlier Stuart volumes. Notwithstanding, it should serve its purpose well as a text for courses covering our Latin American relations.

Austin, Texas

J. LLOYD MECHAM
